# Supplementary material for: Spin Crossover and Thermochromism in Iron(II) Complexes with 2,6-Bis(1H-imidazol-2-yl)-4-methoxypyridine
Source: MDPI journal article supplement (doi:10.3390/ijms24129853), 2023-06-07
Supplement: s1 [file s1]

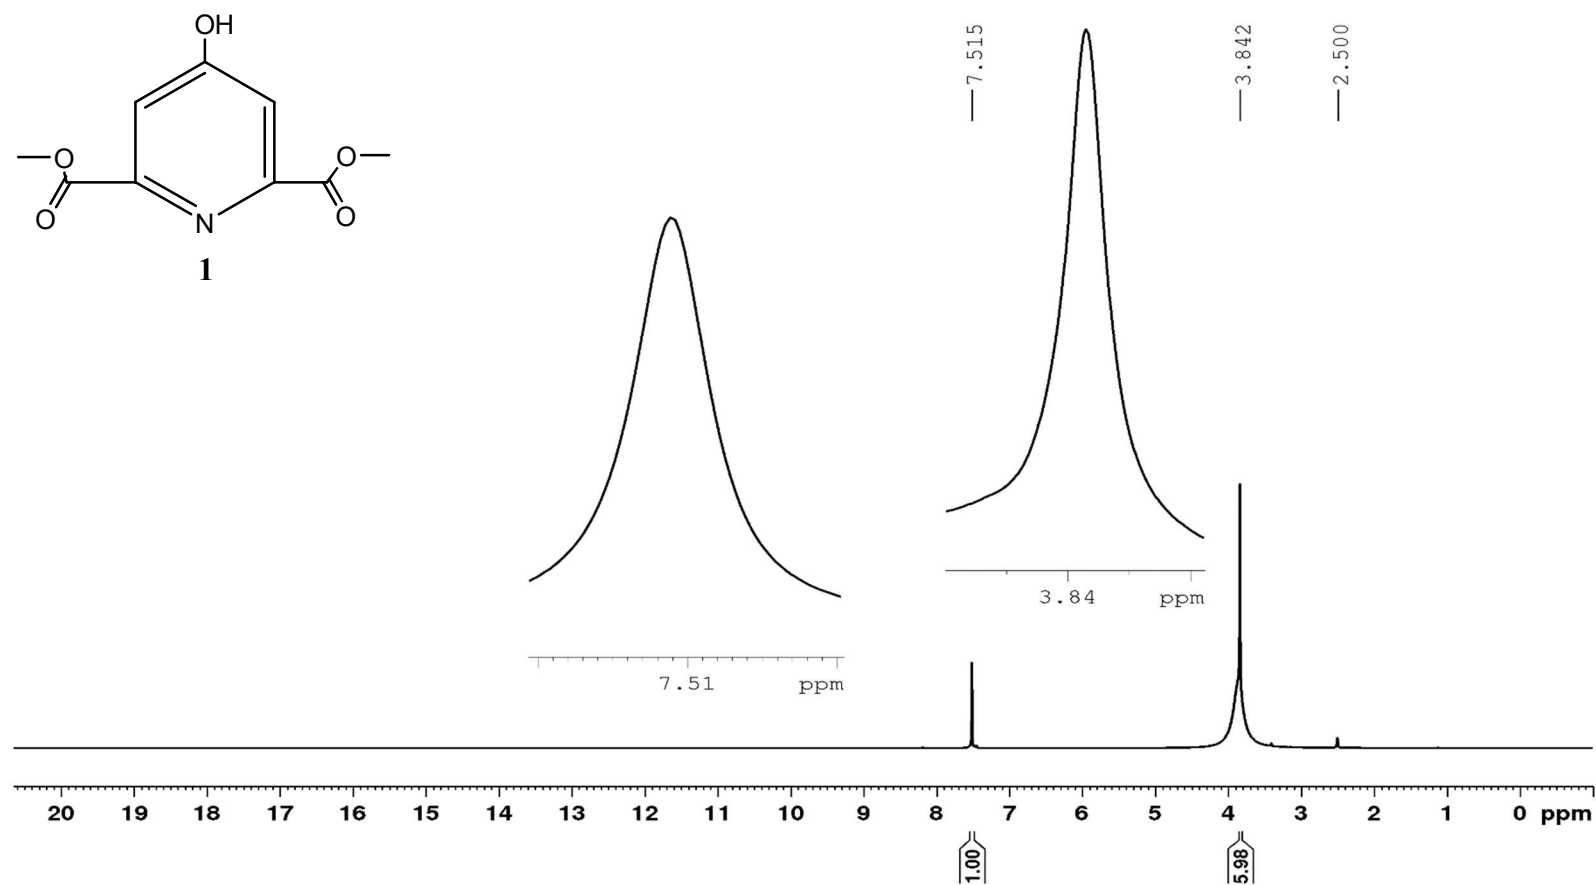

**Figure S1.** <sup>1</sup>H NMR spectrum of **1**, AV 400, NS 8, DMSO-d<sub>6</sub>.

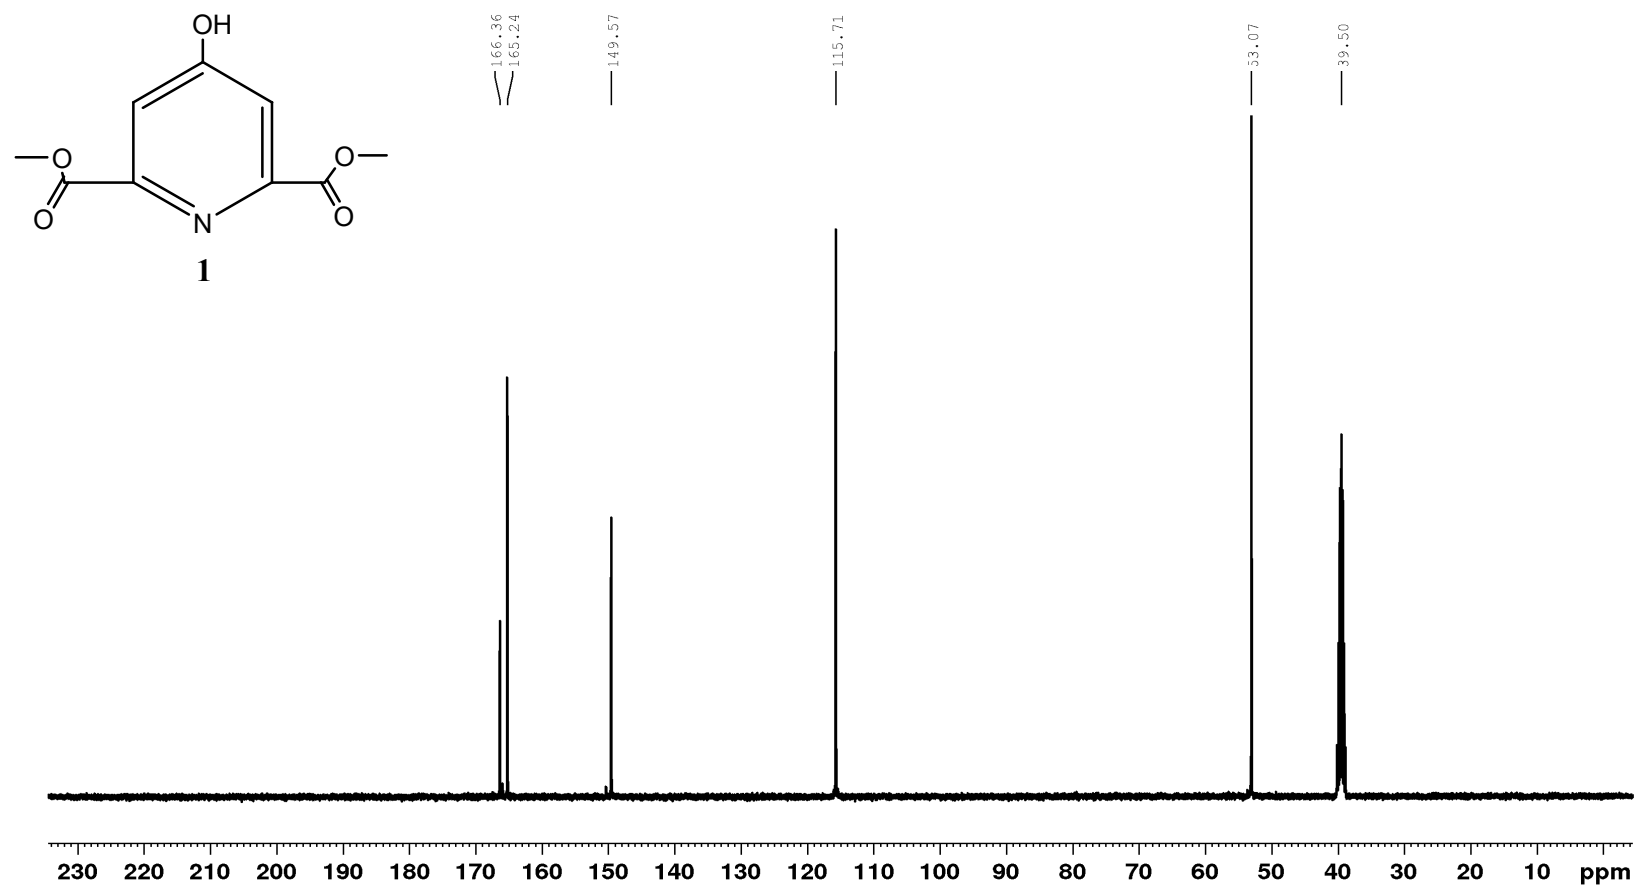

**Figure S2.**  $^{13}\text{C}$  NMR spectrum of **1**, AV 400, NS 208, DMSO- $\text{d}_6$ .

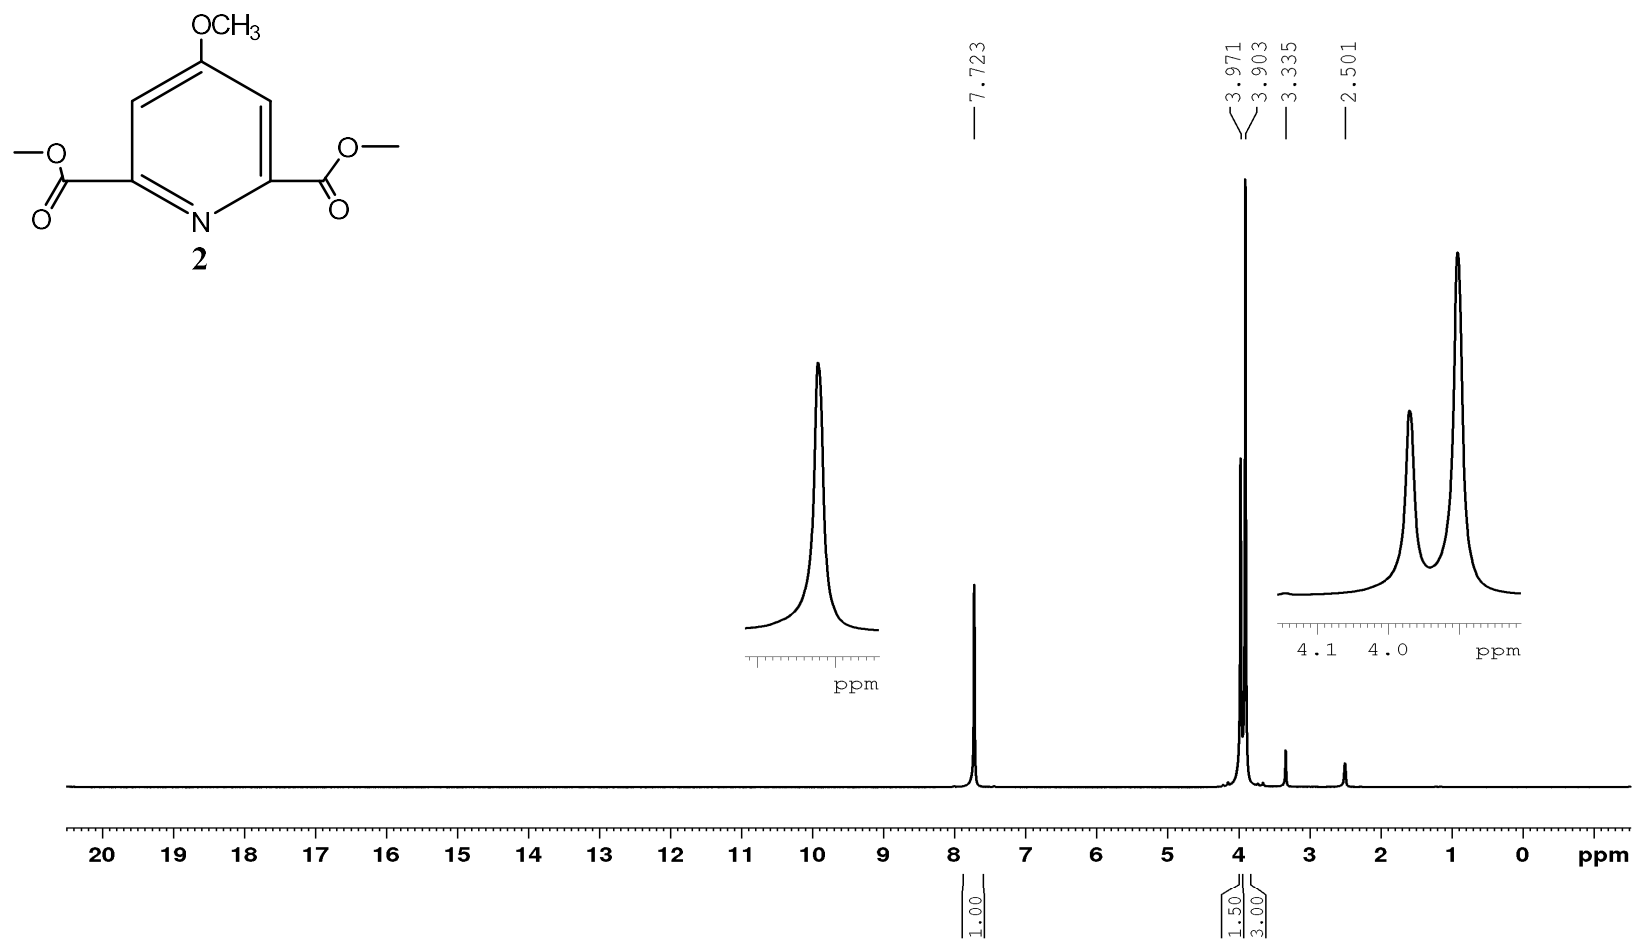

**Figure S3.**  $^1\text{H}$  NMR spectrum of **2**, AV 300, NS 16, DMSO- $d_6$ .

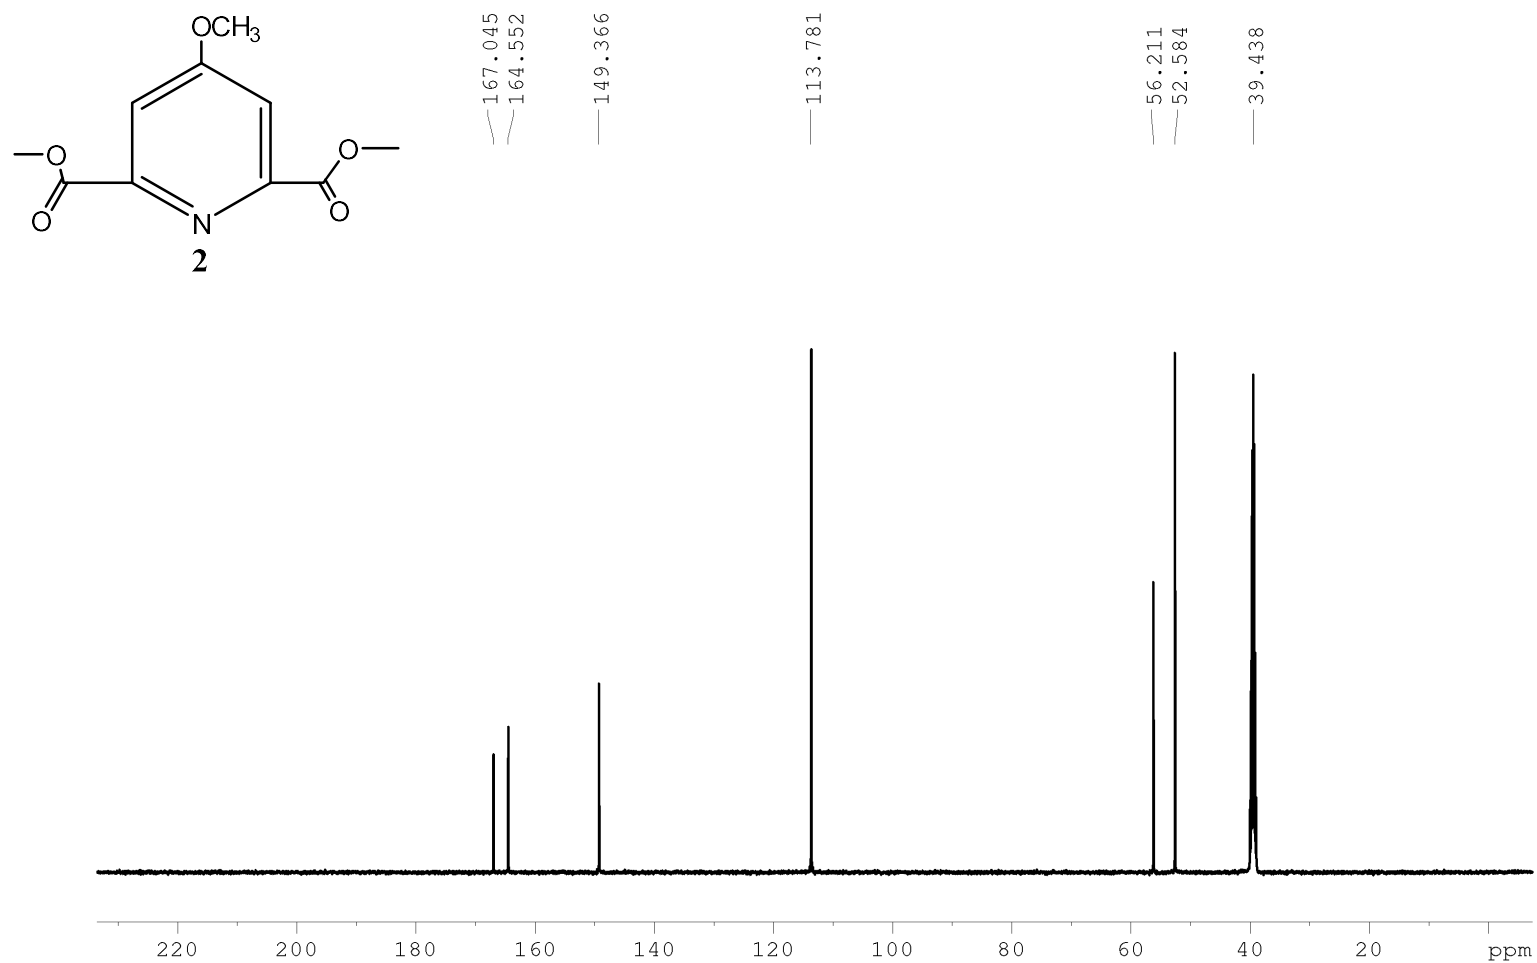

**Figure S4.**  $^{13}\text{C}$  NMR spectrum of **2**, AV 500, NS 672, DMSO- $\text{d}_6$ .

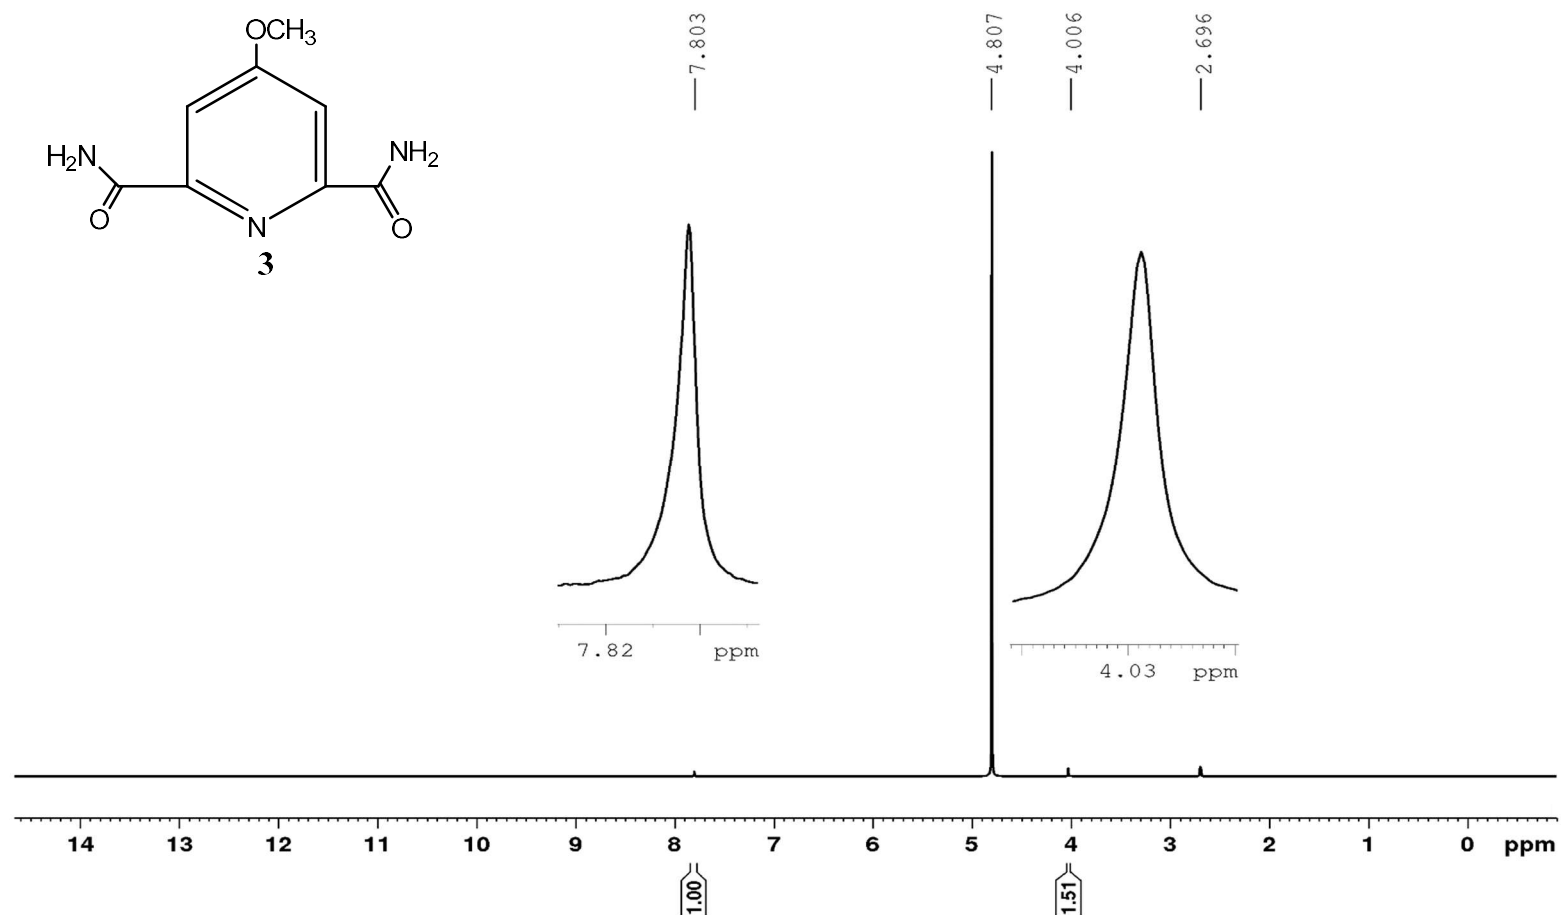

**Figure S5.** <sup>1</sup>H NMR spectrum of **3**, AV 300, NS 16, D<sub>2</sub>O/DMSO-d<sub>6</sub>.

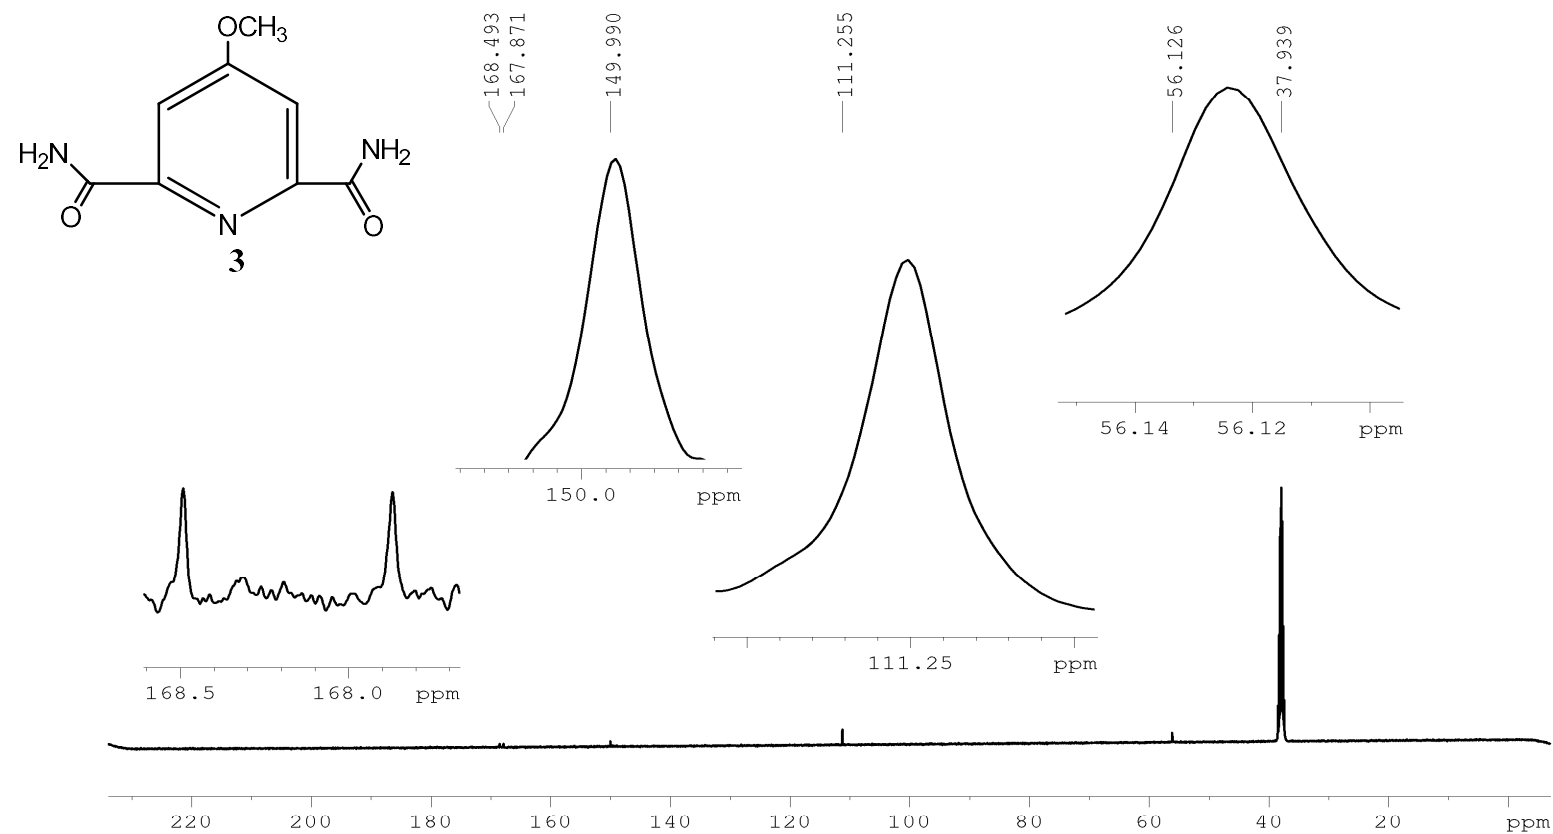

**Figure S6.**  $^{13}\text{C}$  NMR spectrum of **3**, DRX 500, NS 30944,  $\text{D}_2\text{O}/\text{DMSO-d}_6$ .

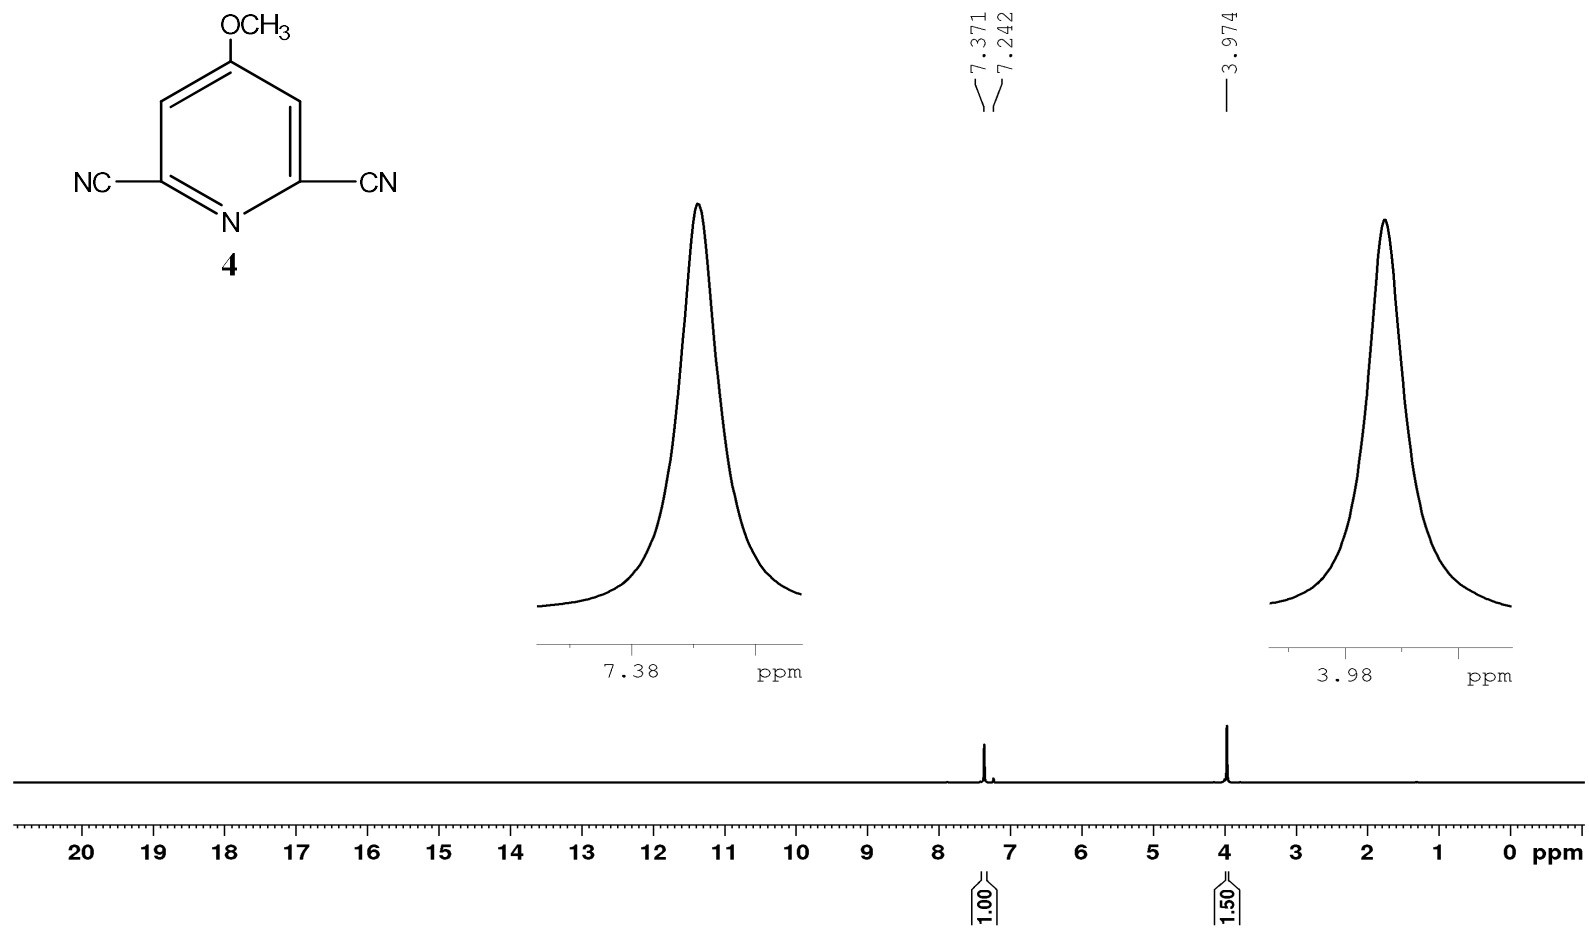

**Figure S7.**  $^1\text{H}$  NMR spectrum of **4**, AV 400, NS 16,  $\text{CDCl}_3$ .

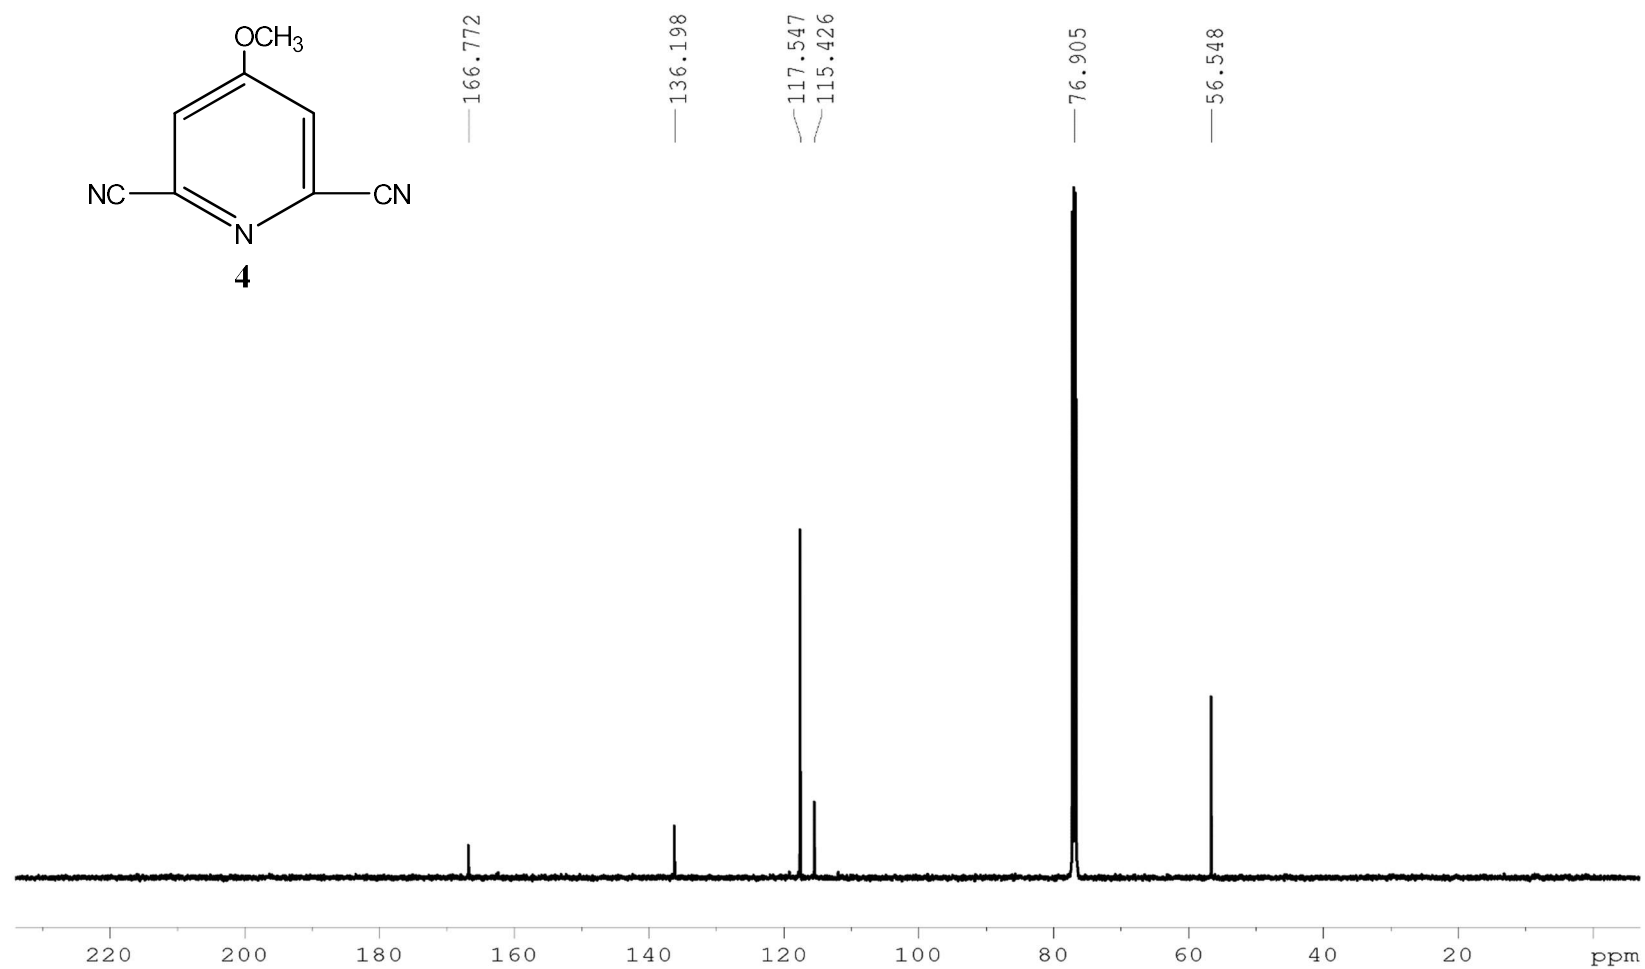

**Figure S8.**  $^{13}\text{C}$  NMR spectrum of **4**, DRX 500, NS 2304,  $\text{CDCl}_3$ .



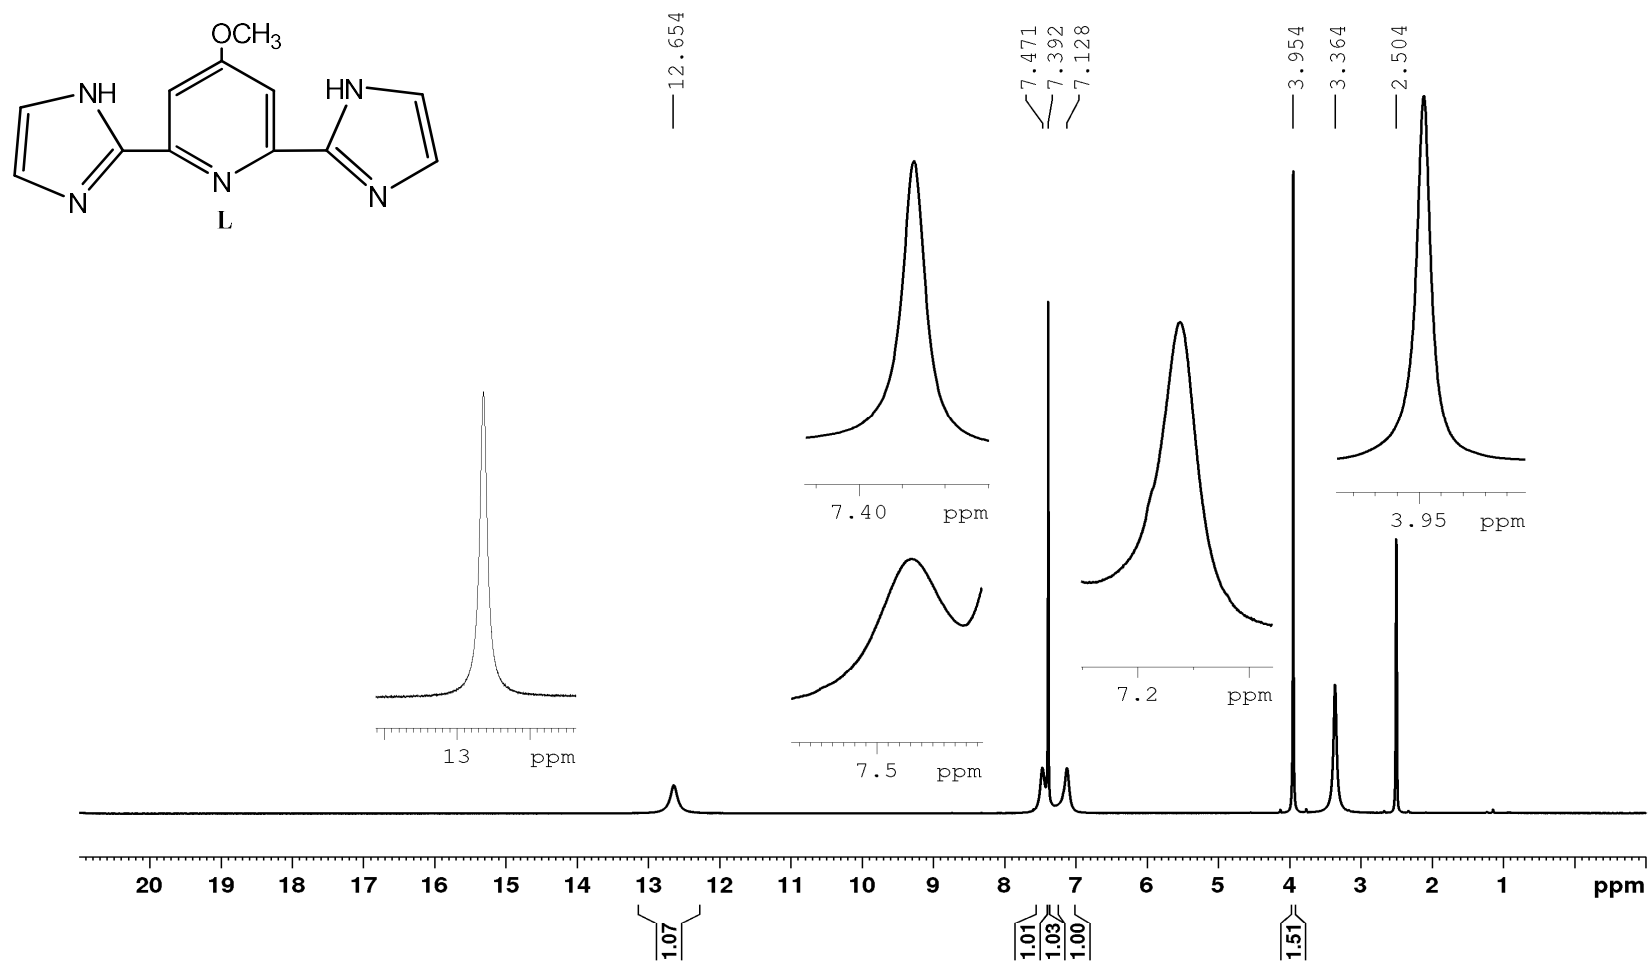

**Figure S9.** <sup>1</sup>H NMR spectrum of **L**, AV 400, NS 80, DMSO-d<sub>6</sub>.

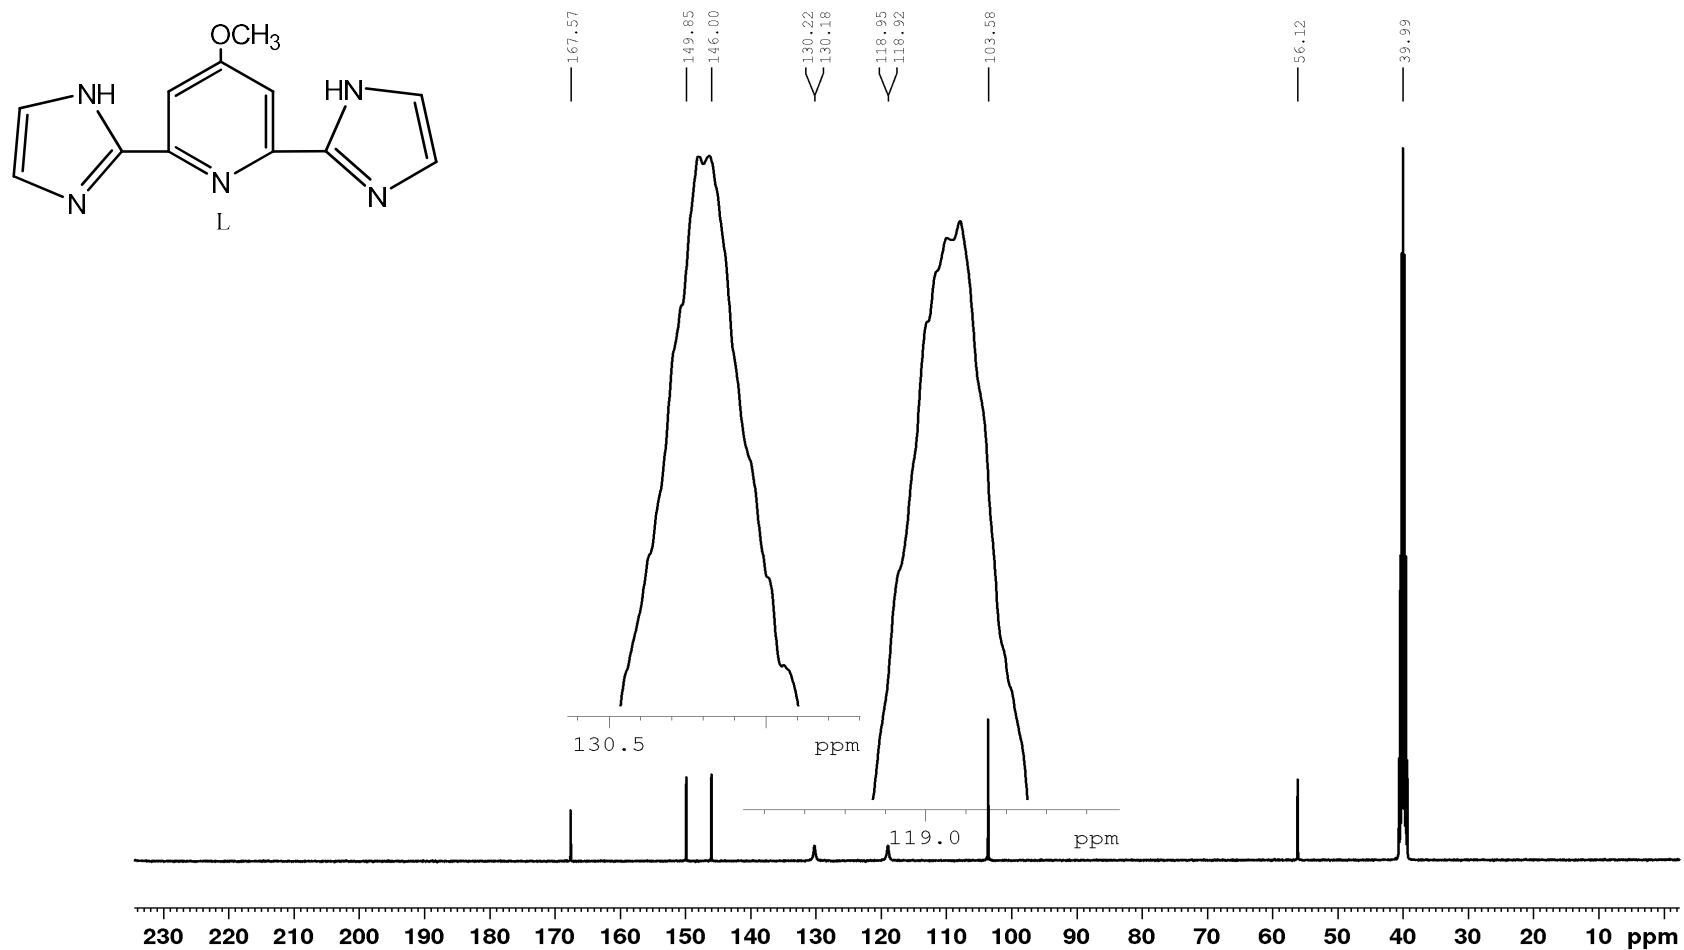

**Figure S10.** <sup>13</sup>C NMR spectrum of **L**, AV 400, NS 6832, DMSO-d<sub>6</sub>.

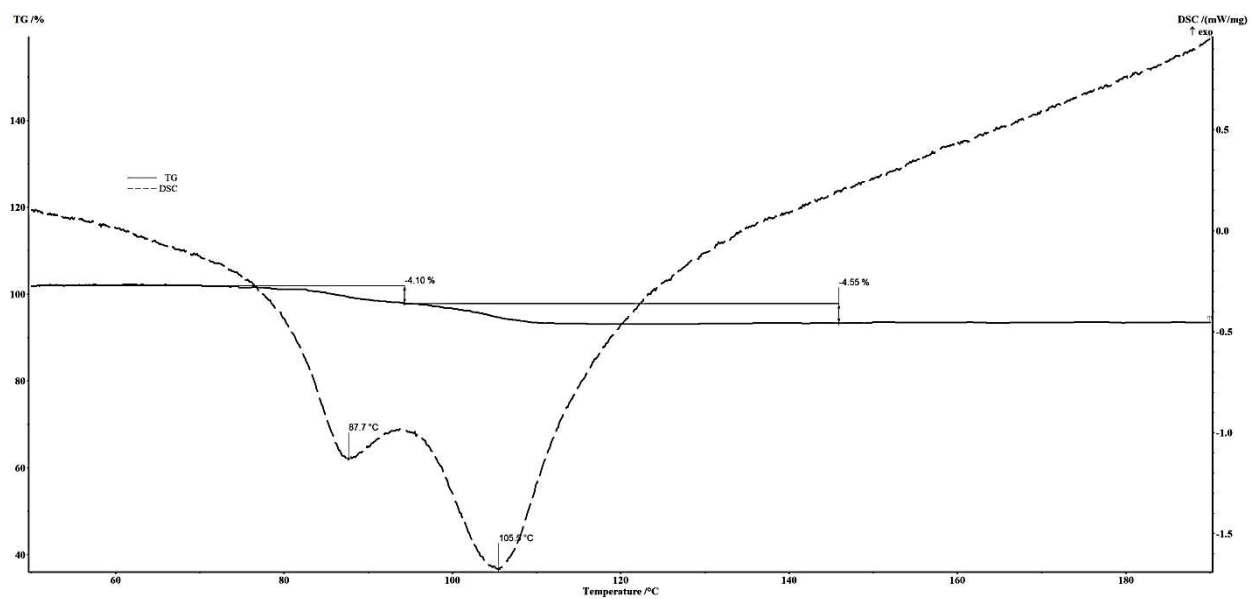

**Figure S11.** TG/DSC curves of L·1.2H<sub>2</sub>O

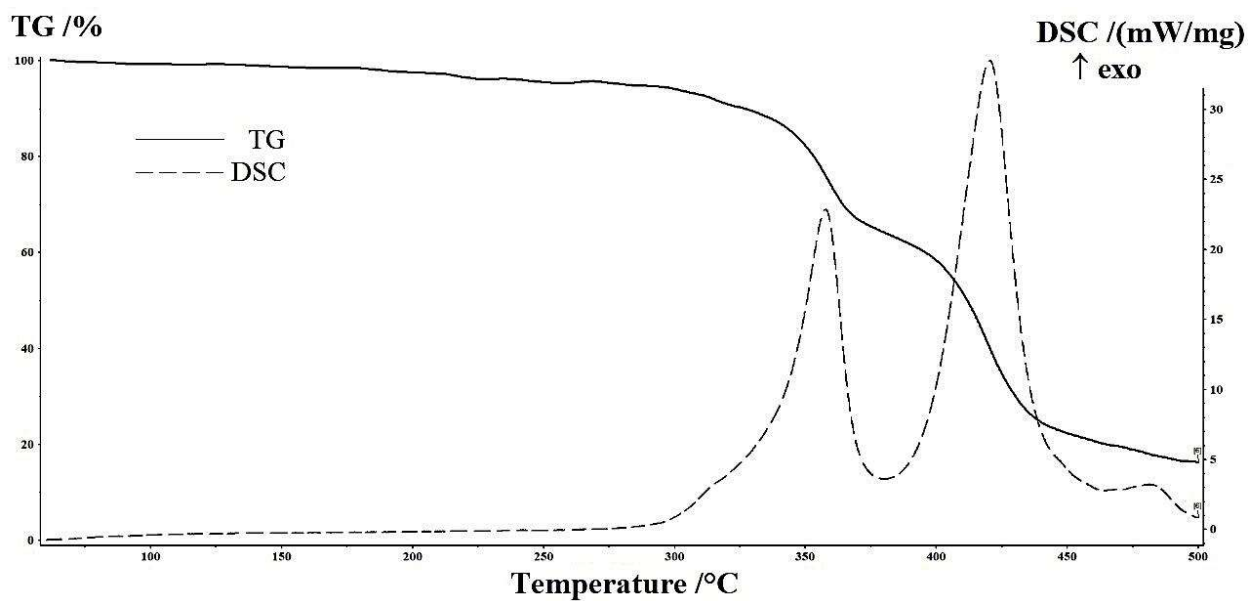

**Figure S12.** TG/DSC curves of I

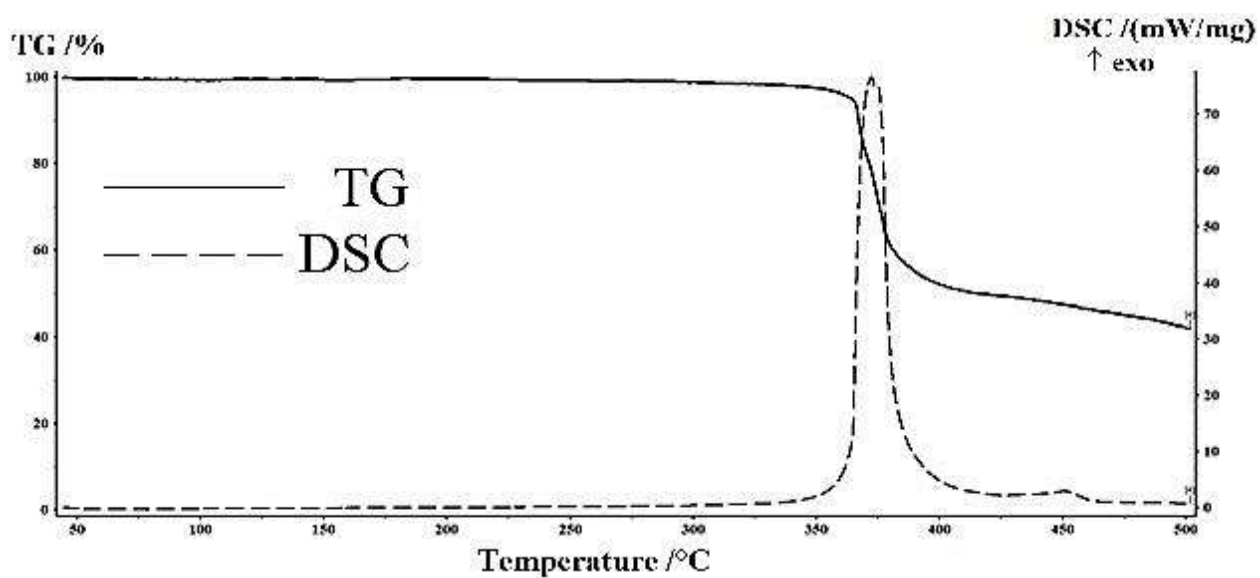

Figure S13. TG/DSC curves of II

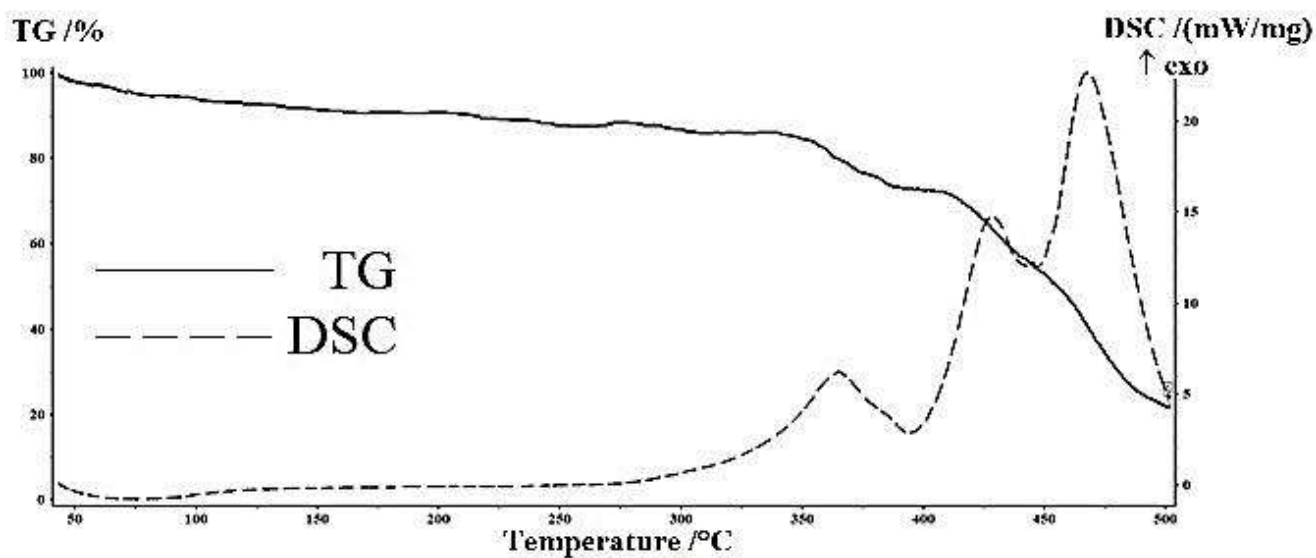

Figure S14. TG/DSC curves of III

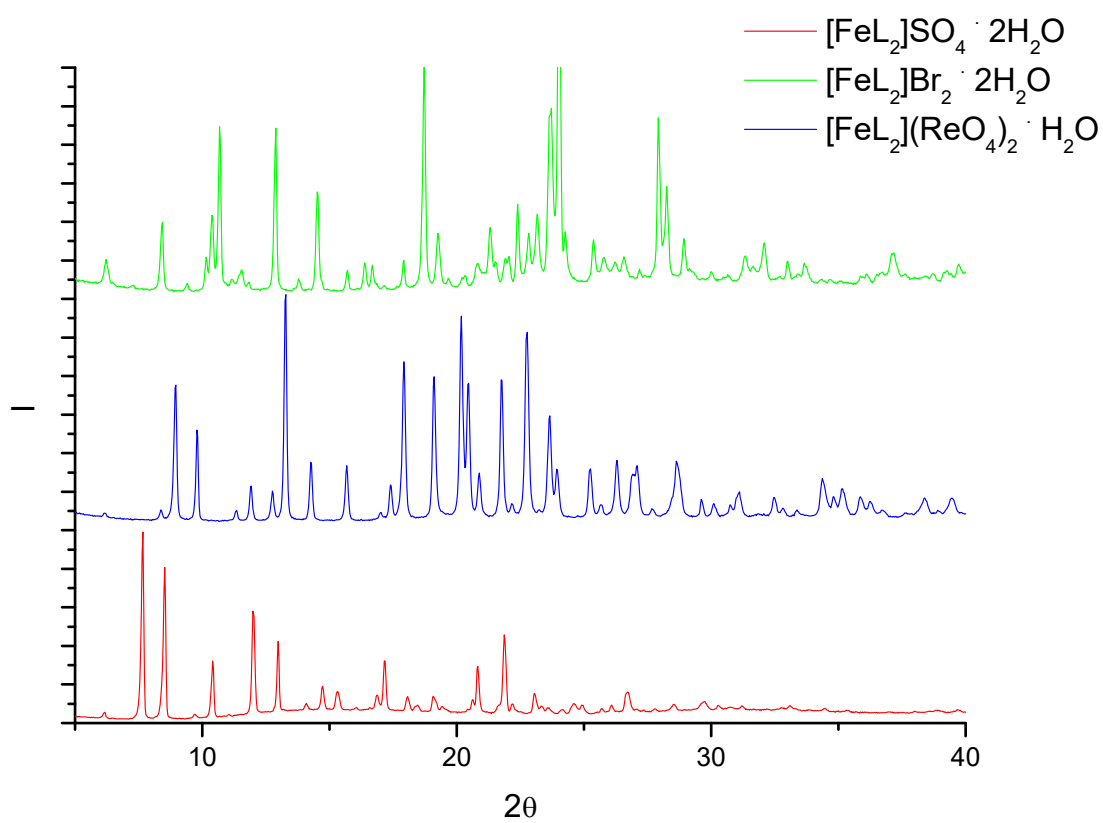

**Figure S15.** Diffractograms of complexes

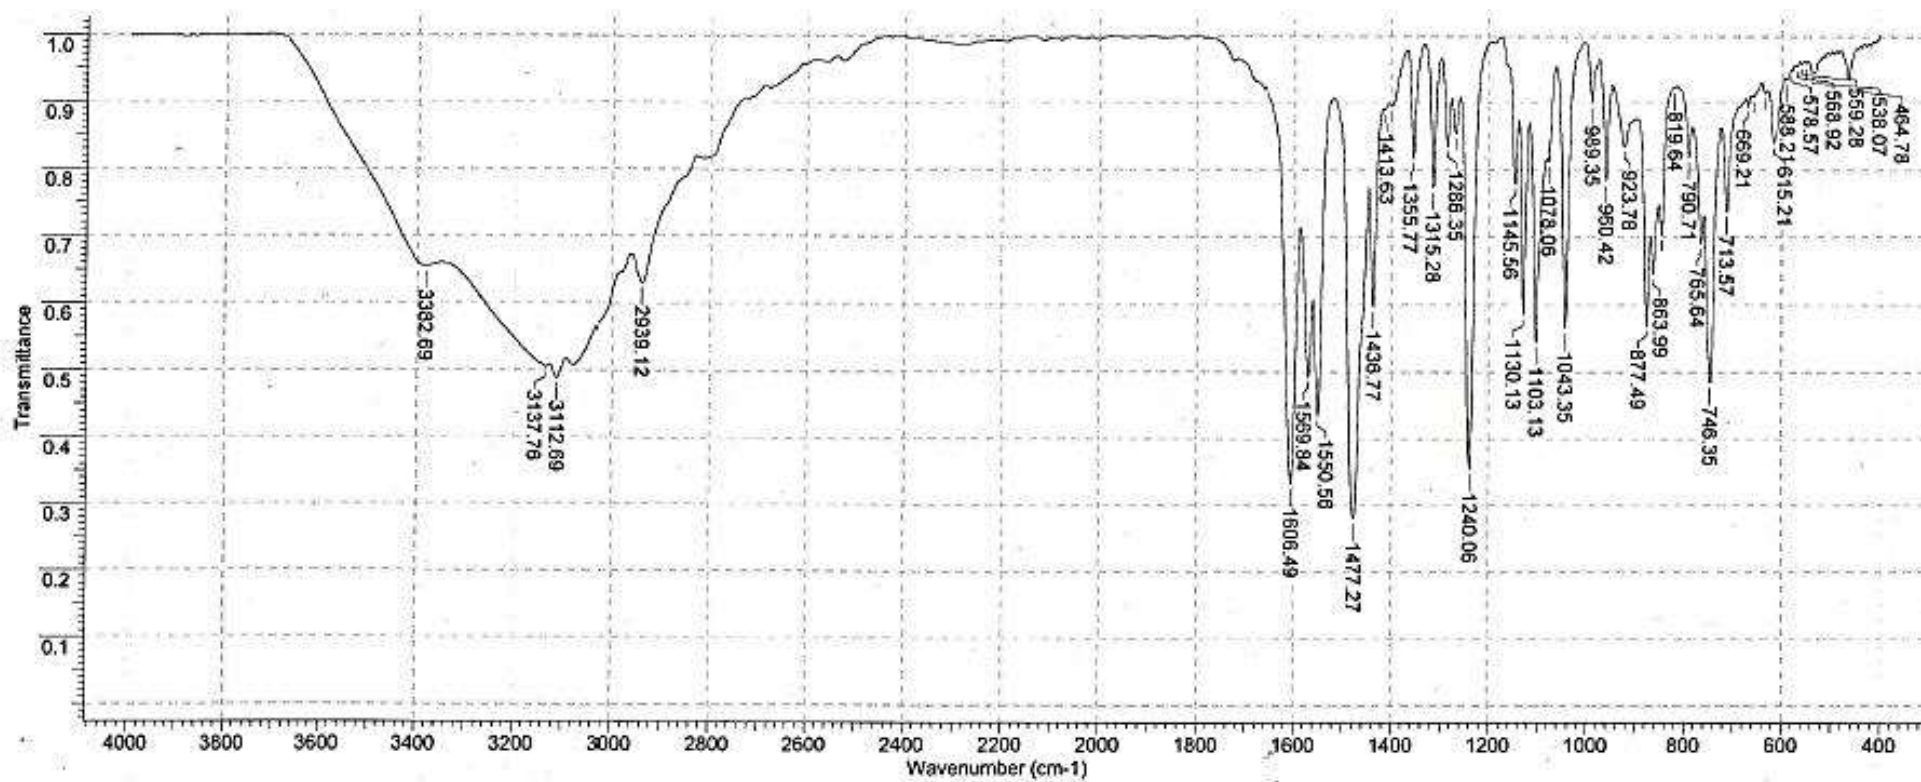

Figure S16. IR spectrum of L

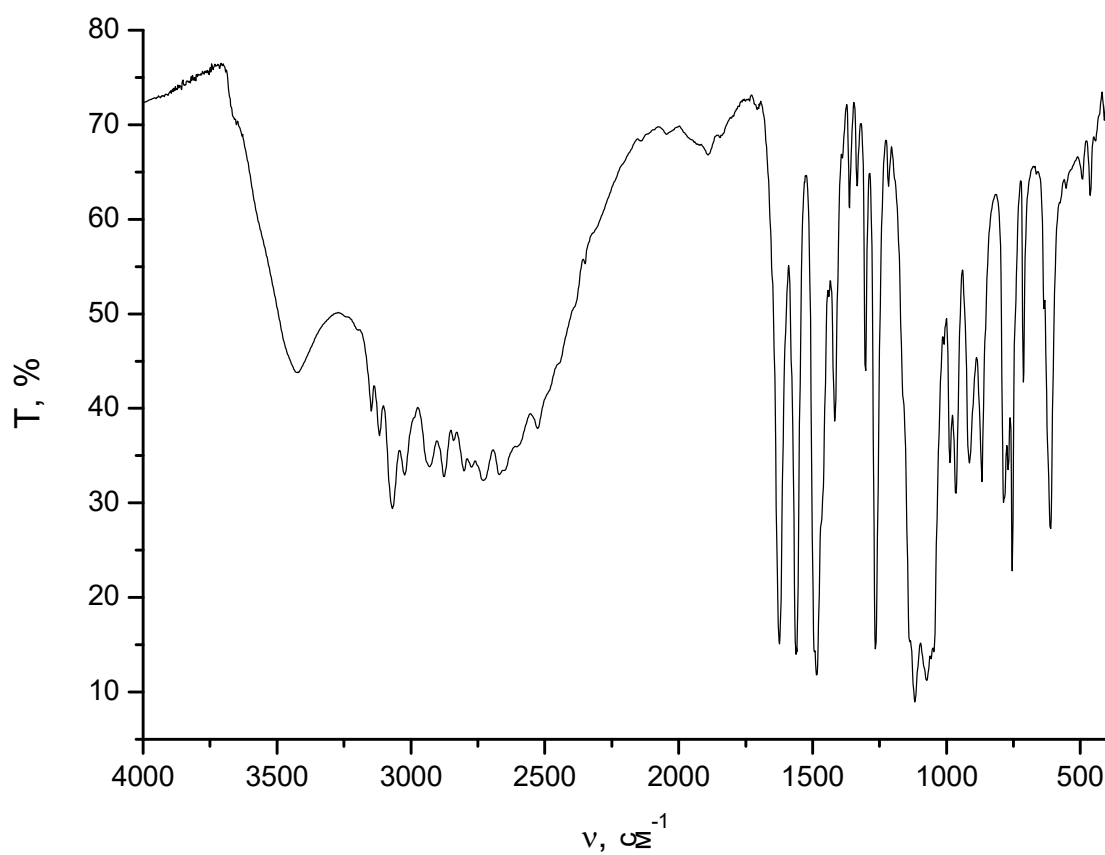

**Figure S17.** IR spectrum of **I**

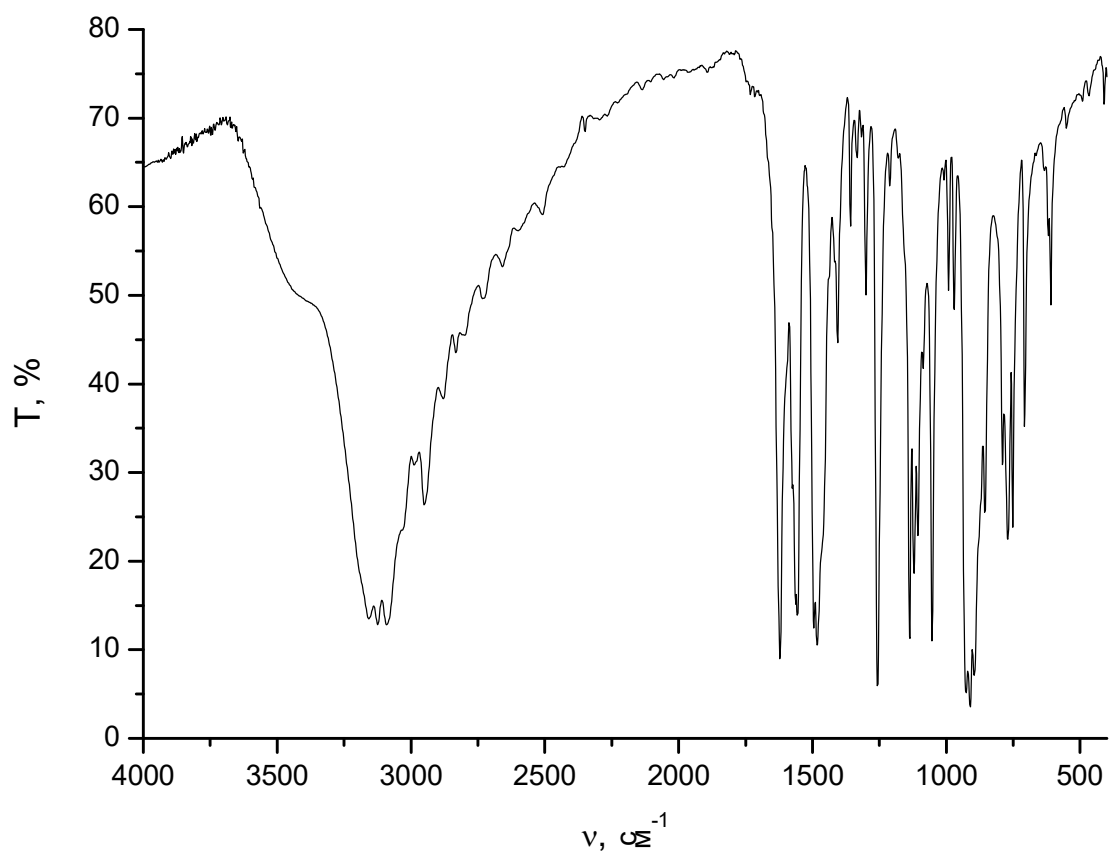

**Figure S18.** IR spectrum of **II**

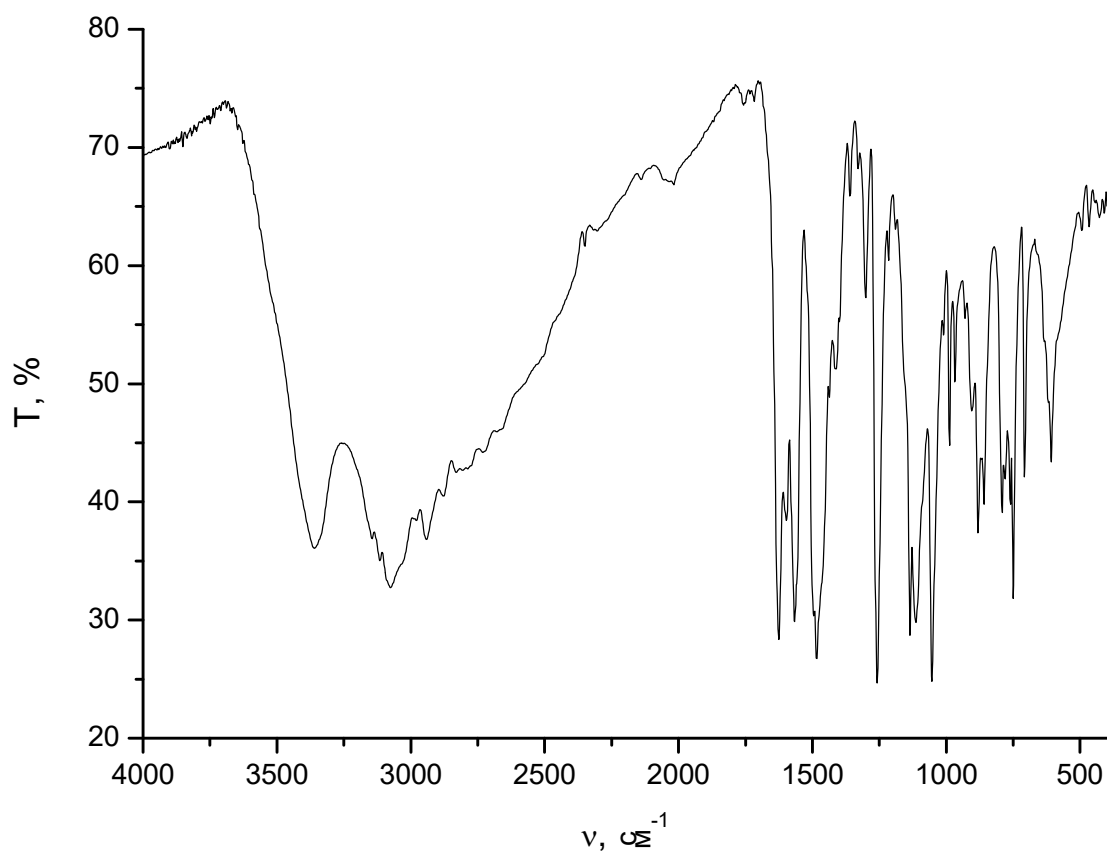

**Figure S19.** IR spectrum of **III**

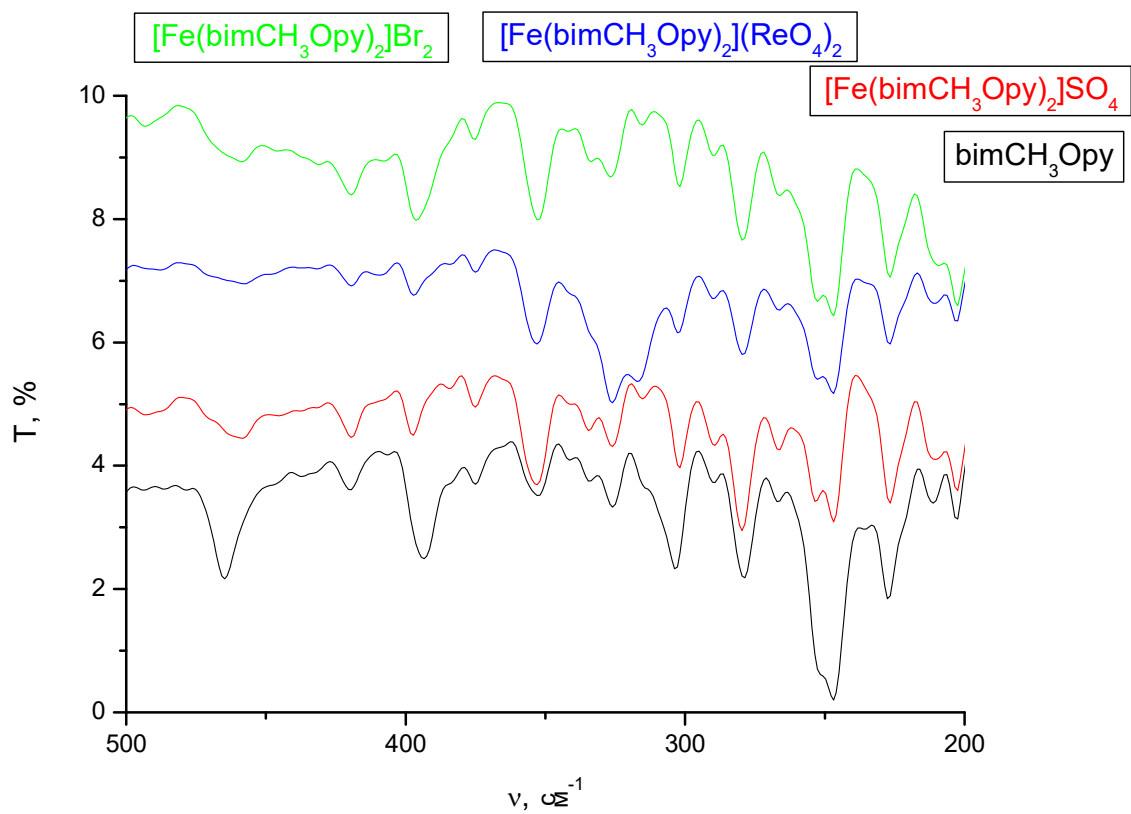

**Figure S20.** Low-frequency IR spectra of **L** and **I – III**



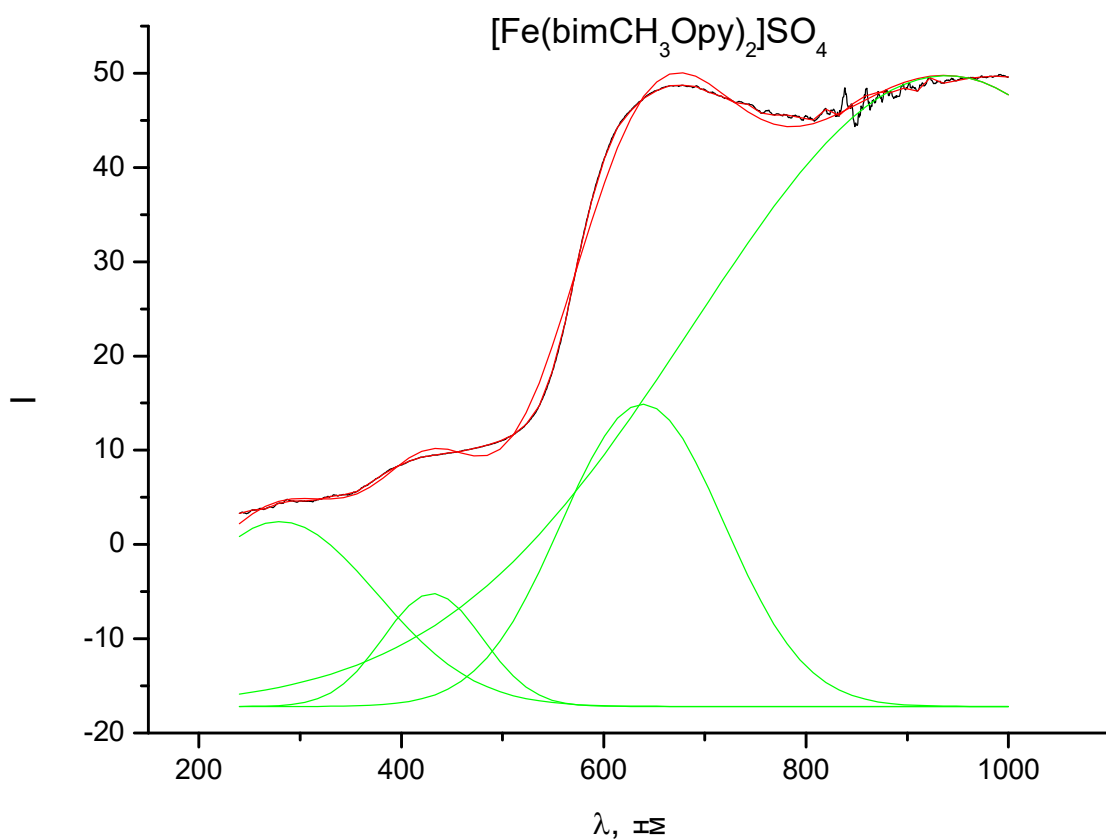

**Figure S21. DRS of I**

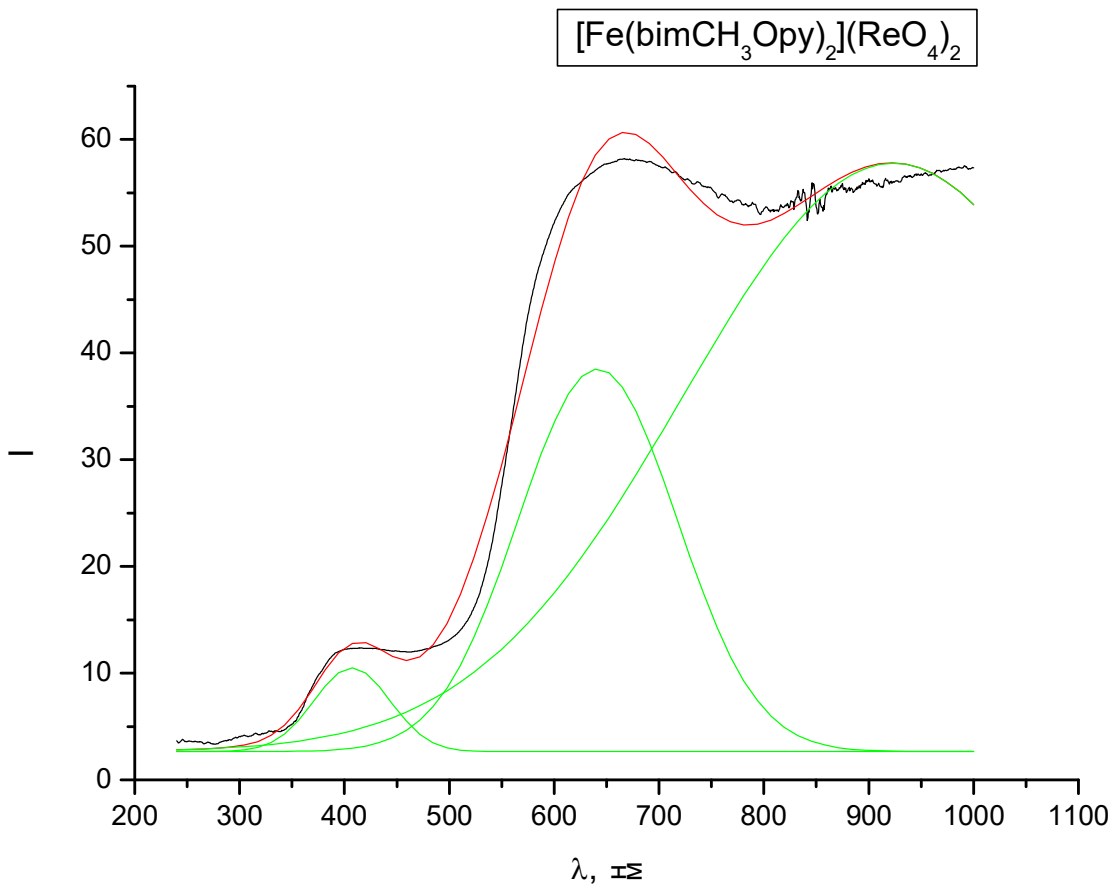

**Figure S22. DRS of II**

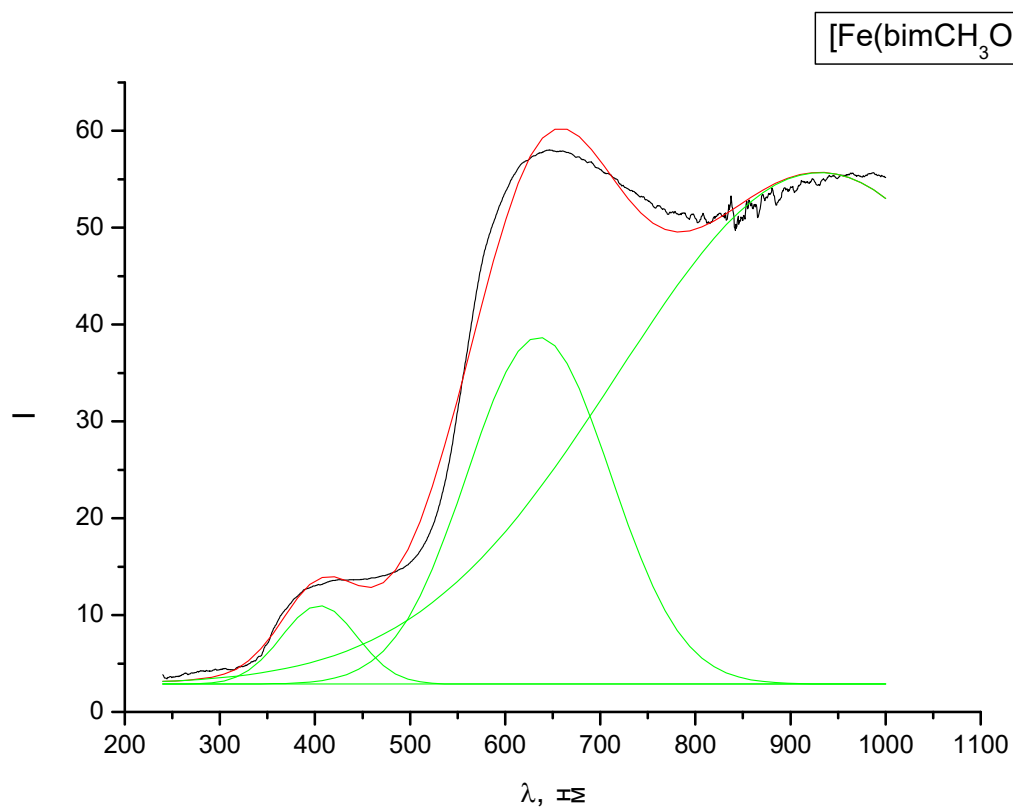

**Figure S23.** DRS of **III**
